# Supplementary material for: A facile solid phase reaction to prepare TiO2 mesocrystals with exposed {001} facets and high photocatalytic activity
Source: Royal Society of Chemistry journal article supplement (doi:10.1039/c3ce27095e), 2013-01-01
Supplement: c3ce27095e.pdf [file c3ce27095e.pdf]

A facile solid phase reaction to prepare TiO<sub>2</sub> mesocrystals with exposed {001} facets and high  
photocatalytic activity

Li ZHOU<sup>a</sup>, Jin CHEN<sup>a</sup>, Chuan JI<sup>a</sup>, Lei ZHOU<sup>a, b \*</sup> and Paul O'BRIEN<sup>c</sup>

<sup>a</sup> Department of Biomedical Engineering, School of Life Science and Technology, Huazhong University of Science and Technology, Wuhan, 430074 (P.R. China).

<sup>b</sup> Advanced Biomaterials and Tissue Engineering Center, Huazhong University of Science and Technology, Wuhan, 430074 (P.R. China).

<sup>c</sup> School of Chemistry & Manchester Materials Science Center, The University of Manchester, Manchester, M13 9PL (UK).

\* Corresponding to: Lei ZHOU; Tel: 0086-(0)27-87792216; E-mail: lei.zhou.public@gmail.com

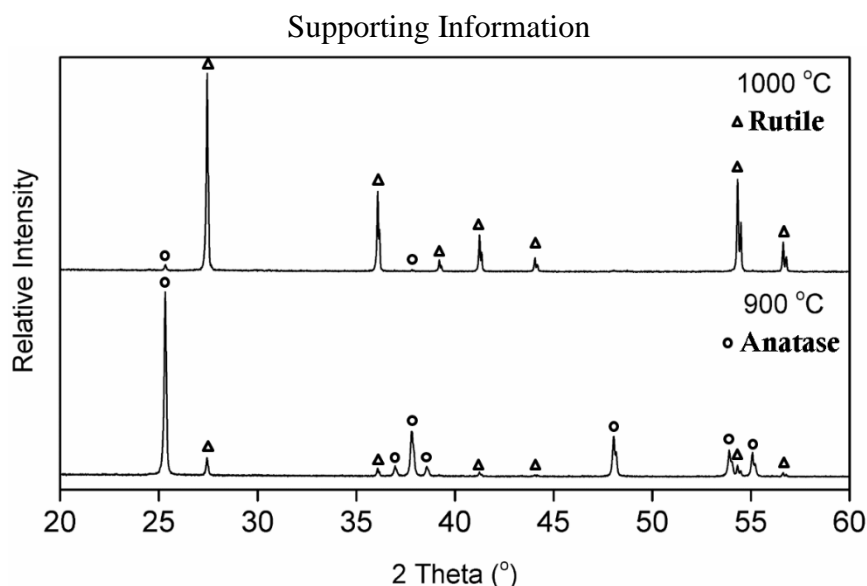

Fig. S1 Powder XRD patterns of the mesocrystalline samples sintered at 900 °C (a) and 1000 °C (b).

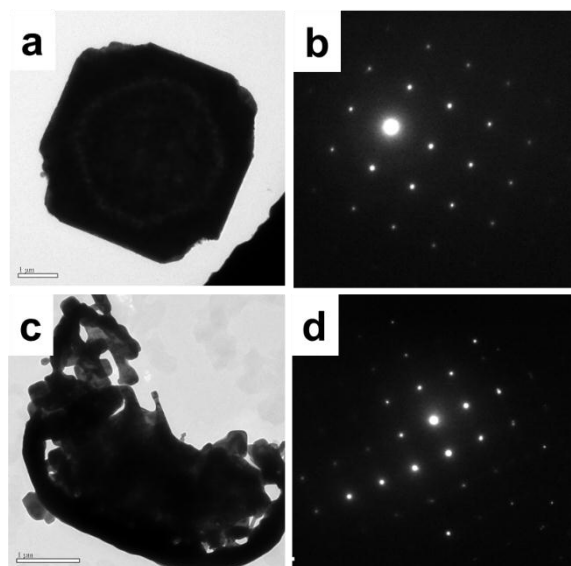

Fig. S2 TEM images and SAED patterns of the mesocrystalline samples sintered at 700 °C (a and b) and 900 °C (c and d).

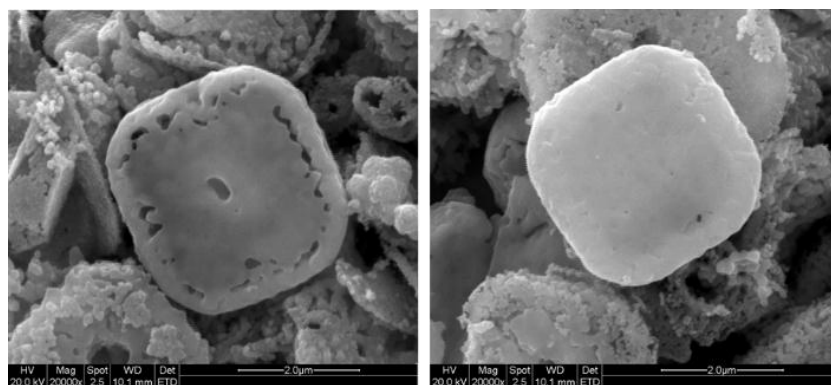

Fig. S3 SEM images of the 700 °C mesocrystalline samples, which was prepared by sintering the  $\text{NH}_4\text{TiOF}_3$  mesocrystals from room temperature.
